# Supplementary material for: Vaginal Lactobacilli and Vaginal Dysbiosis-Associated Bacteria Differently Affect Cervical Epithelial and Immune Homeostasis and Anti-Viral Defenses
Source: MDPI journal article supplement (doi:10.3390/ijms22126487), 2021-06-17
Supplement: s1 [file s1]

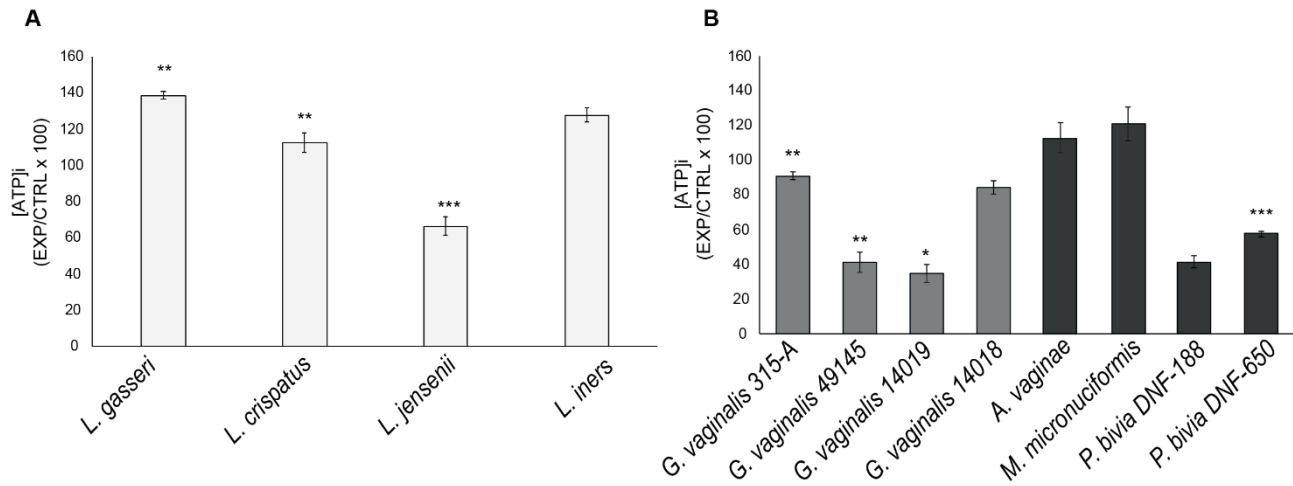

**Supplementary figure S1. Effects of bacterial lysates on CaSki cell viability.** ATP production by cells cultured with bacteria lysates (1µg/mL) from (A) *Lactobacillus* spp. or from (B) others vaginal dysbiosis bacteria (*A. vaginae*, *M. micronuciformis*, *P. bivia* DNF-188 and *P.bivia* DNF 650) for 24 hrs. The bar-graph shows results from one representative experiment out of three performed. Data are expressed as ATP produced by stimulated cultures/unstimulated control  $\pm$  standard deviation (EXP/CTRL $\times$ 100). Differences among stimulated and unstimulated cultures were evaluated by Student t-test. P \* = p-value < 0.05; \*\*= p-value < 0.01; \*\*\*= p-value < 0.001.

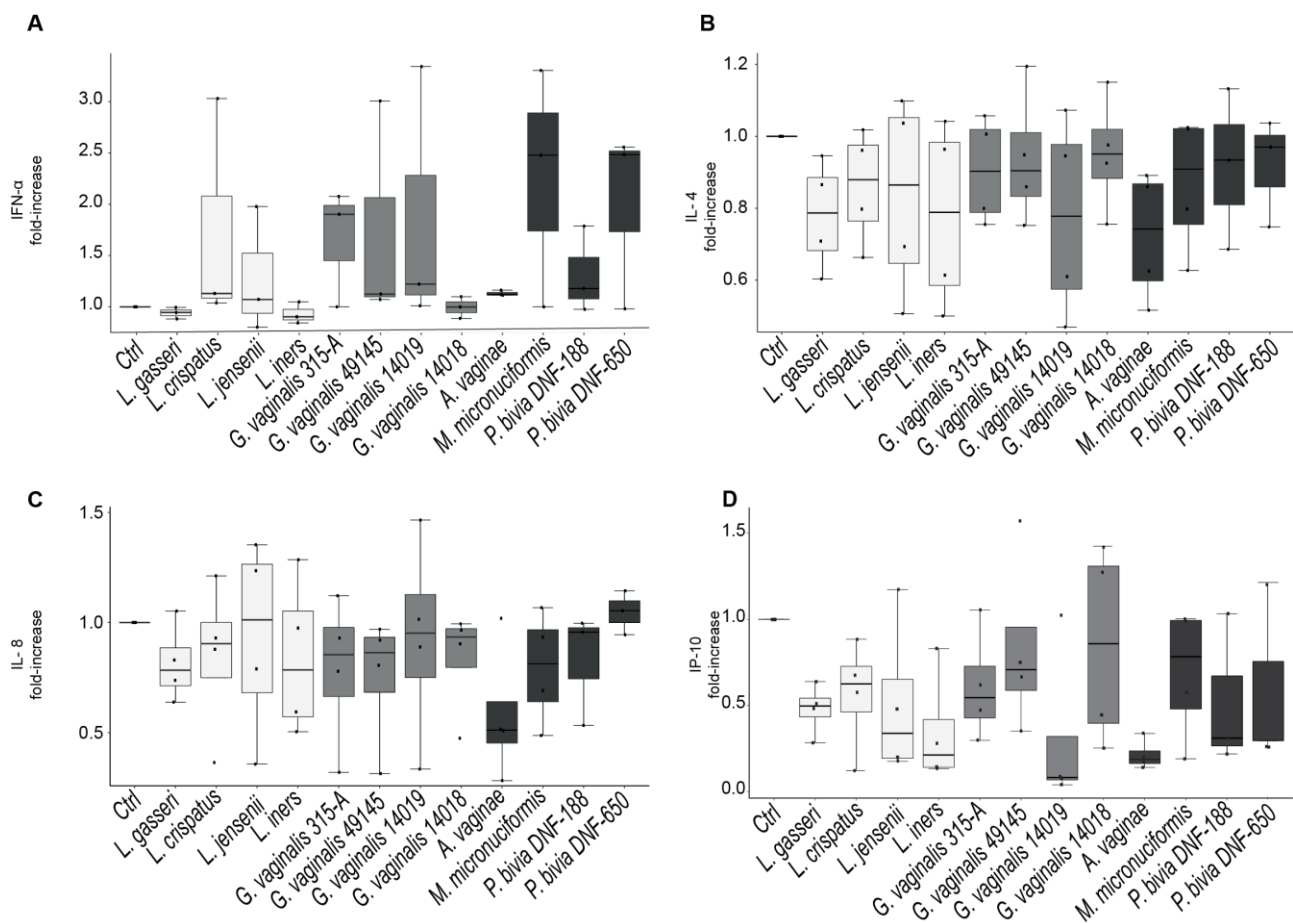

**Supplementary figure S2. Cytokine's production by PBMCs stimulated with dominant species of vaginal microbiota.**

Cytokine concentration was measured in culture supernatants of bacterial-stimulated cultures. Results are expressed as fold increase in cytokine concentration respect to unstimulated cultures. The bar-graph shows the median and the whisker is calculated on the formula  $IQR \times 1.5$ . Statistical analysis was performed by Kruskal-Wallis. No significant differences among cultures were found.

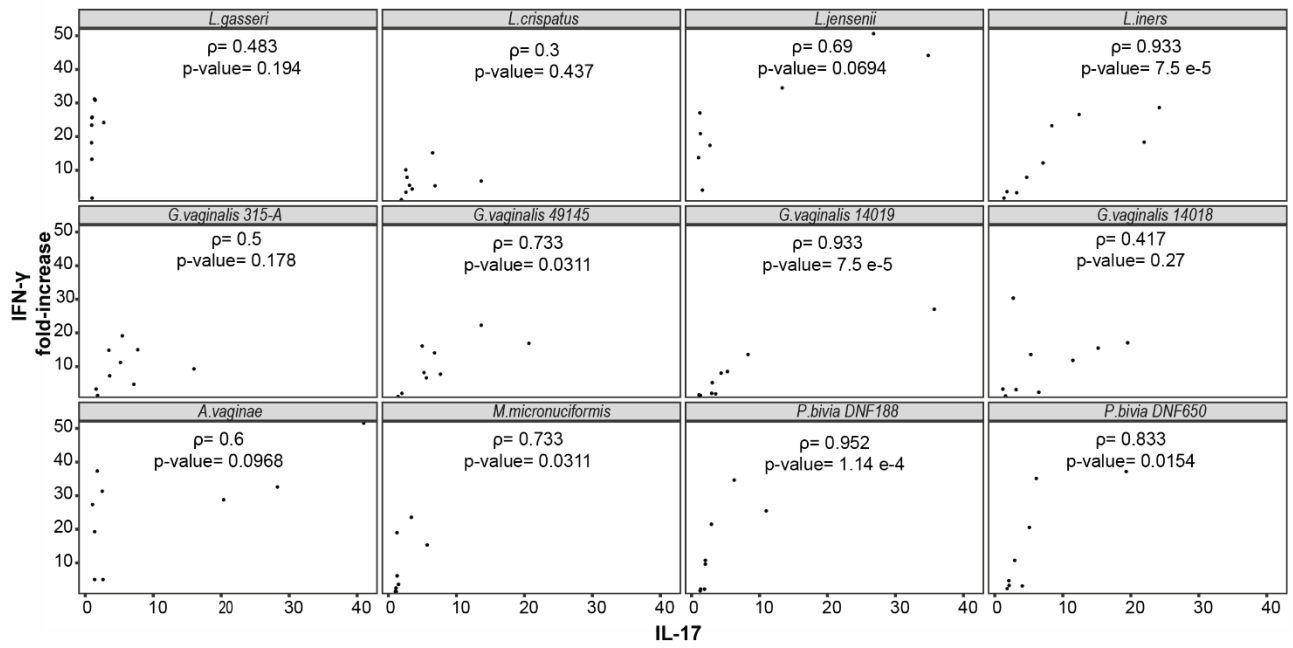

**Supplementary figure S3. Spearman's correlation analysis among the cytokines' production induced by *Lactobacillus* spp. and other bacteria related to vaginal dysbiosis.** Correlation among cytokines produced under different stimulation was evaluated by Spearman rank correlation analysis.

**A**

|                          | IL-1 $\beta$ (pg/mL) $\pm$ SD | TNF- $\alpha$ (pg/mL) $\pm$ SD | IL-8 (pg/mL) $\pm$ SD |
|--------------------------|-------------------------------|--------------------------------|-----------------------|
| <i>Ctrl</i>              | 1.47 $\pm$ 0.13               | 4.01 $\pm$ 0.12                | 742.32 $\pm$ 8.41     |
| <i>L.gasseri</i>         | 1.97 $\pm$ 0.81               | 2.46 $\pm$ 0.11                | 647.05 $\pm$ 131.71   |
| <i>L.crispatus</i>       | 1.26 $\pm$ 0.14               | 5.94 $\pm$ 0.08                | 568.69 $\pm$ 95.32    |
| <i>L.jensenii</i>        | 1.22 $\pm$ 0.10               | 2.94 $\pm$ 0.13                | 707.51 $\pm$ 12.43    |
| <i>L.iners</i>           | 1.15 $\pm$ 0.10               | 2.44 $\pm$ 0.09                | 739.50 $\pm$ 40.47    |
| <i>G.vaginalis</i> 315-A | 1.10 $\pm$ 0.09               | 6.60 $\pm$ 0.25                | 632.30 $\pm$ 52.15    |
| <i>G.vagnalis</i> 49145  | 1.08 $\pm$ 0.03               | 1.71 $\pm$ 0.24                | 727.94 $\pm$ 27.74    |
| <i>G.vaginalis</i> 14019 | 1.26 $\pm$ 0.07               | 7.75 $\pm$ 0.11                | 797.51 $\pm$ 13.256   |
| <i>G.vagnalis</i> 14018  | 1.87 $\pm$ 0.28               | 7.02 $\pm$ 0.12                | 876.77 $\pm$ 17.57    |
| <i>A.vaginae</i>         | 1.39 $\pm$ 0.28               | 2.97 $\pm$ 0.12                | 744.07 $\pm$ 49.36    |
| <i>M.micronuciformis</i> | 1.27 $\pm$ 0.30               | 7.48 $\pm$ 0.33                | 778.40 $\pm$ 10.28    |
| <i>P.bivia</i> DNF188    | 1.08 $\pm$ 0.03               | 1.97 $\pm$ 0.17                | 740.15 $\pm$ 63.77    |
| <i>P.bivia</i> DNF650    | 1.18 $\pm$ 0.05               | 2.43 $\pm$ 0.15                | 769.81 $\pm$ 3.75     |

**B**

|                          | IL-1 $\beta$ (pg/mL) $\pm$ SD | TNF- $\alpha$ (pg/mL) $\pm$ SD | IL-8 (pg/mL) $\pm$ SD |
|--------------------------|-------------------------------|--------------------------------|-----------------------|
| <i>Ctrl</i>              | 1.90 $\pm$ 0.04               | 16.41 $\pm$ 2.29               | 2684.12 $\pm$ 106.32  |
| <i>L.gasseri</i>         | 2.52 $\pm$ 0.48               | 10.93 $\pm$ 1.44               | 2272.98 $\pm$ 51.08   |
| <i>L.crispatus</i>       | 2.43 $\pm$ 0.64               | 8.99 $\pm$ 0.71                | 1953.39 $\pm$ 51.26   |
| <i>L.jensenii</i>        | 2.61 $\pm$ 0.42               | 11.10 $\pm$ 1.11               | 2538.76 $\pm$ 82.63   |
| <i>L.iners</i>           | 2.45 $\pm$ 0.35               | 10.00 $\pm$ 0.61               | 2848.66 $\pm$ 80.62   |
| <i>G.vaginalis</i> 315-A | 2.40 $\pm$ 0.14               | 8.88 $\pm$ 0.96                | 2176.82 $\pm$ 155.30  |
| <i>G.vagnalis</i> 49145  | 2.43 $\pm$ 1.21               | 8.99 $\pm$ 0.95                | 2609.90 $\pm$ 113.51  |
| <i>G.vaginalis</i> 14019 | 2.71 $\pm$ 0.11               | 9.45 $\pm$ 0.31                | 3182.85 $\pm$ 99.00   |
| <i>G.vagnalis</i> 14018  | 2.61 $\pm$ 0.40               | 9.64 $\pm$ 0.21                | 2937.82 $\pm$ 177.05  |
| <i>A.vaginae</i>         | 2.26 $\pm$ 0.14               | 8.52 $\pm$ 0.47                | 2877.37 $\pm$ 49.34   |
| <i>M.micronuciformis</i> | 3.09 $\pm$ 0.55               | 11.84 $\pm$ 0.95               | 2882.99 $\pm$ 169.91  |
| <i>P.bivia</i> DNF188    | 2.22 $\pm$ 0.118              | 8.35 $\pm$ 0.39                | 2142.71 $\pm$ 70.51   |
| <i>P.bivia</i> DNF650    | 2.30 $\pm$ 0.35               | 9.79 $\pm$ 0.74                | 1679.37 $\pm$ 102.46  |

**Supplementary Table S1. Cytokine's production by epithelial cells stimulated with dominant species of vaginal microbiota.** SiHa (A) and CaSki (B) cells were cultured with heat-inactivated bacterial cells (50 CFU/cell) from *Lactobacillus* spp., or *Gardnerella vaginalis*, or other vaginal dysbiosis bacteria (*A. vaginae*, *M. micronuciformis*, *P. bivia* DNF-188 and *P. bivia* DNF-650). Cytokine's concentration was assessed in supernatants after 5 days of culture through Multiplex Assay (IL-1 $\beta$ , TNF- $\alpha$ ) or ELISA Assay (IL-8).
